# Supplementary material
Source: bioRxiv or medRxiv preprint supplement (https://medrxiv.org/highwire/filestream/91234/field_highwire_adjunct_files/0/2020.07.22.20154542-1.pdf)
Supplement: Supplementary file [file 2020.07.22.20154542-1.pdf]

## Supplementary Information

**Supplementary Table 1. Demographics**

| Characteristics                         | Minocycline | Tetracycline | Doxycycline | Control |
|-----------------------------------------|-------------|--------------|-------------|---------|
| Number of patients                      | 49          | 24           | 50          | 49      |
| Mean age at diagnosis                   | 52          | 61           | 61          | 52      |
| Sex                                     |             |              |             |         |
| M                                       | 36          | 13           | 30          | 36      |
| F                                       | 13          | 11           | 20          | 13      |
| Smoker                                  |             |              |             |         |
| Yes                                     | 19          | 15           | 26          | 21      |
| No                                      | 30          | 9            | 24          | 28      |
| Prior underlying lung disease           |             |              |             |         |
| Yes                                     | 32          | 10           | 27          | 23      |
| No                                      | 17          | 14           | 23          | 26      |
| Mean Charlson's Comorbidity Index       | 5           | 5            | 7           | 5       |
| Mean Duration of ICU stay               | 11          | 14           | 17          | 24      |
| Mechanical ventilation                  |             |              |             |         |
| Yes                                     | 37          | 21           | 39          | 45      |
| No                                      | 14          | 3            | 11          | 4       |
| Mean Duration of mechanical ventilation | 10          | 8            | 11          | 22      |
